# Supplementary material for: Habitat and indigenous gut microbes contribute to the plasticity of gut microbiome in oriental river prawn during rapid environmental change
Source: PubMed Central journal article supplement (PMC5513549; doi:10.1371/journal.pone.0181427), 2017-07-17
Supplement: pone.0181427.s003.pdf [file pone.0181427.s003.pdf]

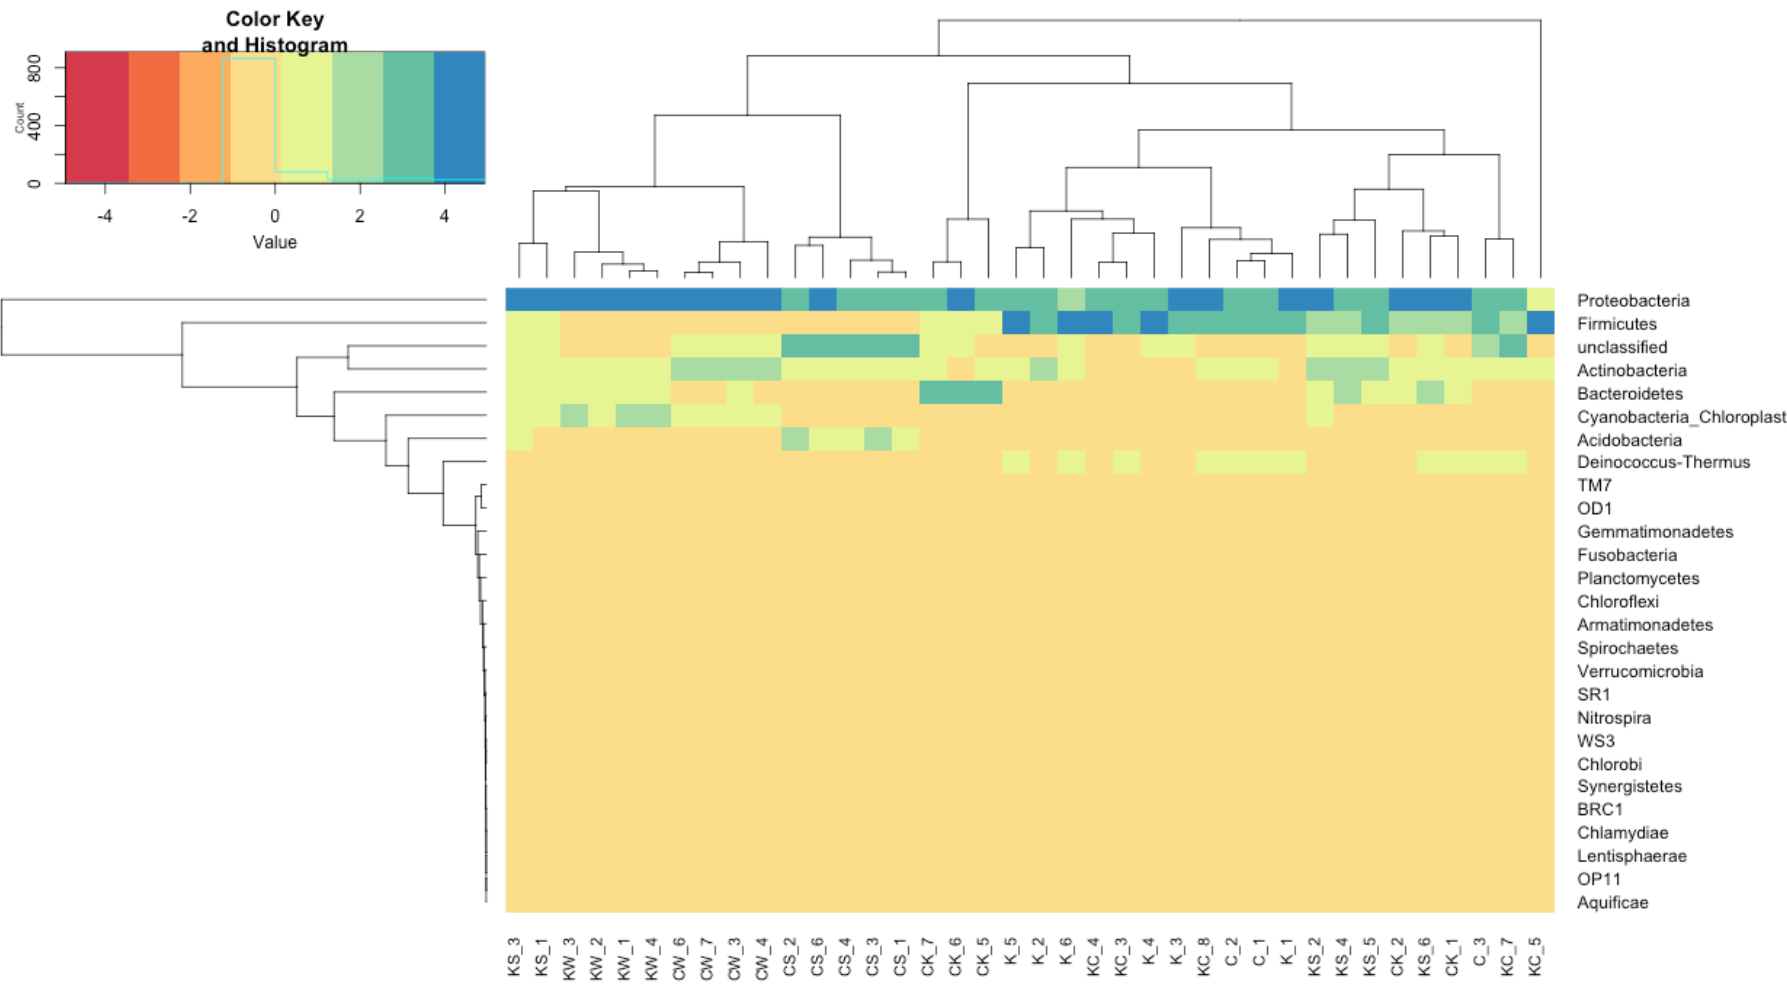

**S1 Fig. Bacterial community composition and enterotype groupings in relation to Phylum-level distribution.**

A heatmap was constructed using the heatmap.2 program within the gplots package for R.
