# Supplementary material for: Habitat and indigenous gut microbes contribute to the plasticity of gut microbiome in oriental river prawn during rapid environmental change
Source: PubMed Central journal article supplement (PMC5513549; doi:10.1371/journal.pone.0181427), 2017-07-17
Supplement: pone.0181427.s005.pdf [file pone.0181427.s005.pdf]

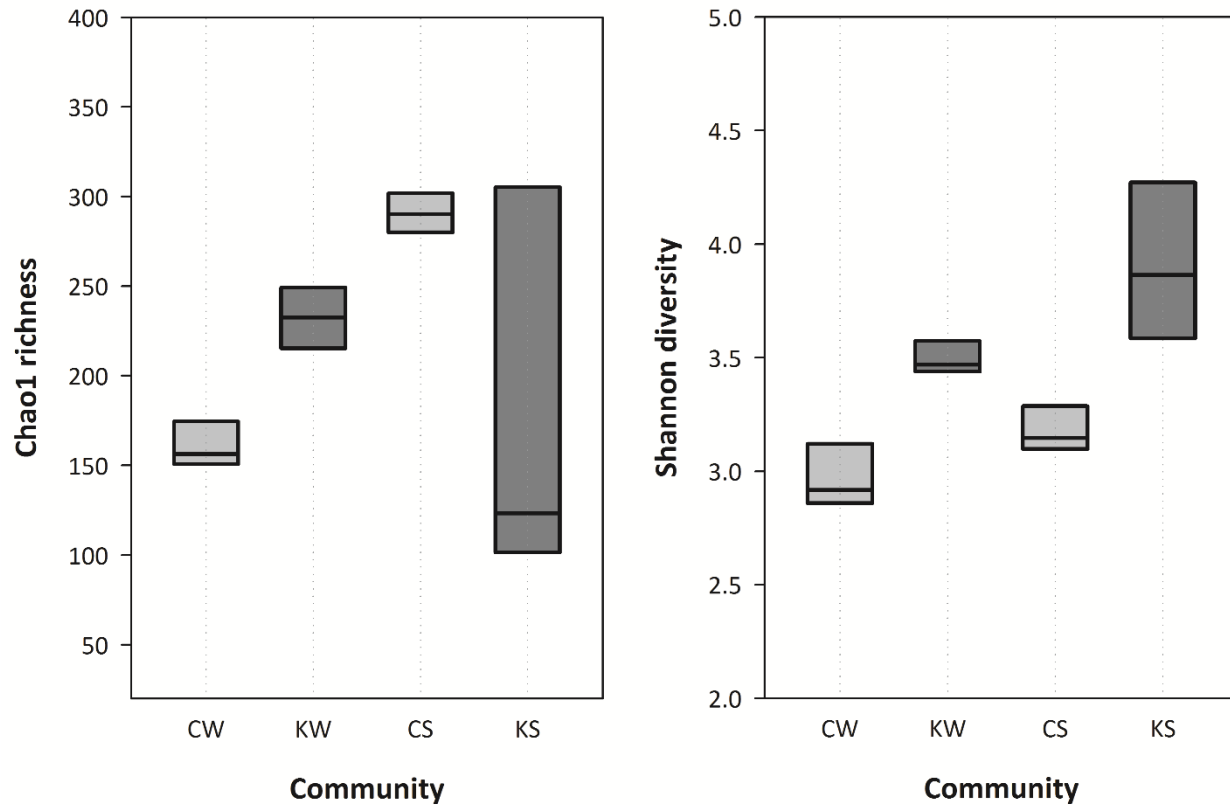

**S3 Fig. Alpha diversity levels (# OTUs) of environmental microbiota in Chengcing Lake and Kaoping River after rarefaction to 20313. Chao1 richness and Shannon diversity all varied between samples from lake and river ( $P < 0.001$ ), except Chao1 between CS and KS ( $P = 0.0388$ ).**
